# Supplementary material for: Direction-oriented fiber guiding with a tunable tri-layer-3D scaffold for periodontal regeneration
Source: Royal Society of Chemistry journal article supplement (doi:10.1039/d4ra01459f), 2024-01-01
Supplement: d4ra01459f1.pdf [file d4ra01459f1.pdf]

## Supplementary information

# Direction-oriented fiber guiding with tunable tri-layer-3D scaffold for periodontal regeneration

Sarin Abraham,<sup>a</sup> Pallavi Gupta,<sup>a</sup> Kavitha Govarthanan,<sup>b</sup> Suresh Rao,<sup>a</sup> and Tuhin Subhra Santra<sup>\*a</sup>

a. Department of Engineering Design, Indian Institute of Technology Madras, Chennai- 600036, India.

b. Institute for Stem Cell Science and Regenerative Medicine (DBT-inStem), Bengaluru, Karnataka - 560065, India

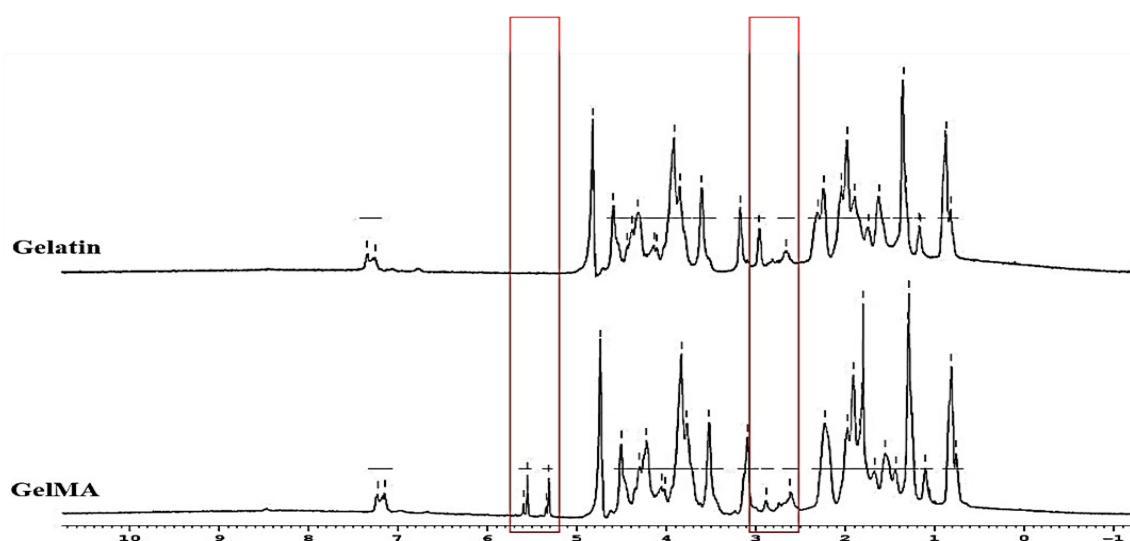

Figure S1. Characterization of GelMA using <sup>1</sup>H NMR spectra of Gelatin and GelMA

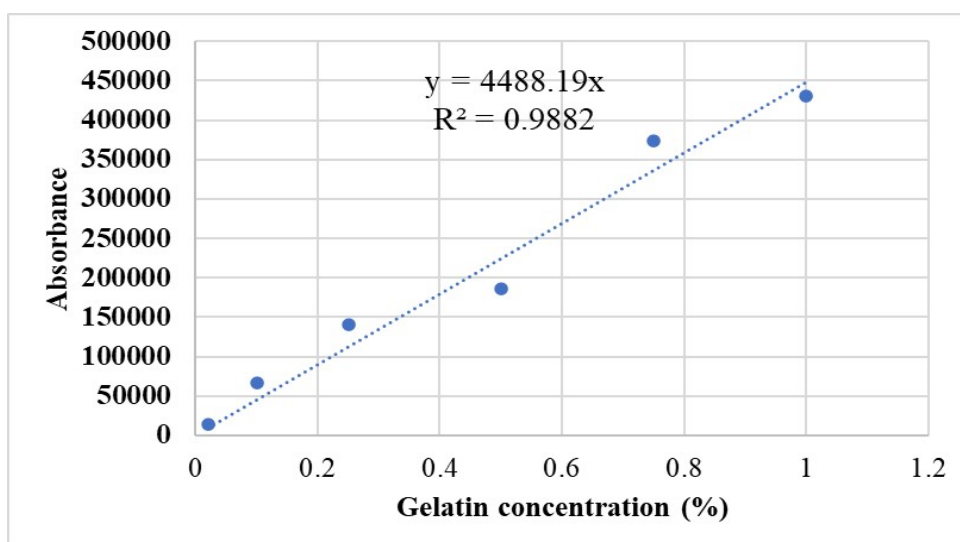

Figure S2. Calibration plot for Fluoraldehyde assay for DoF calculation

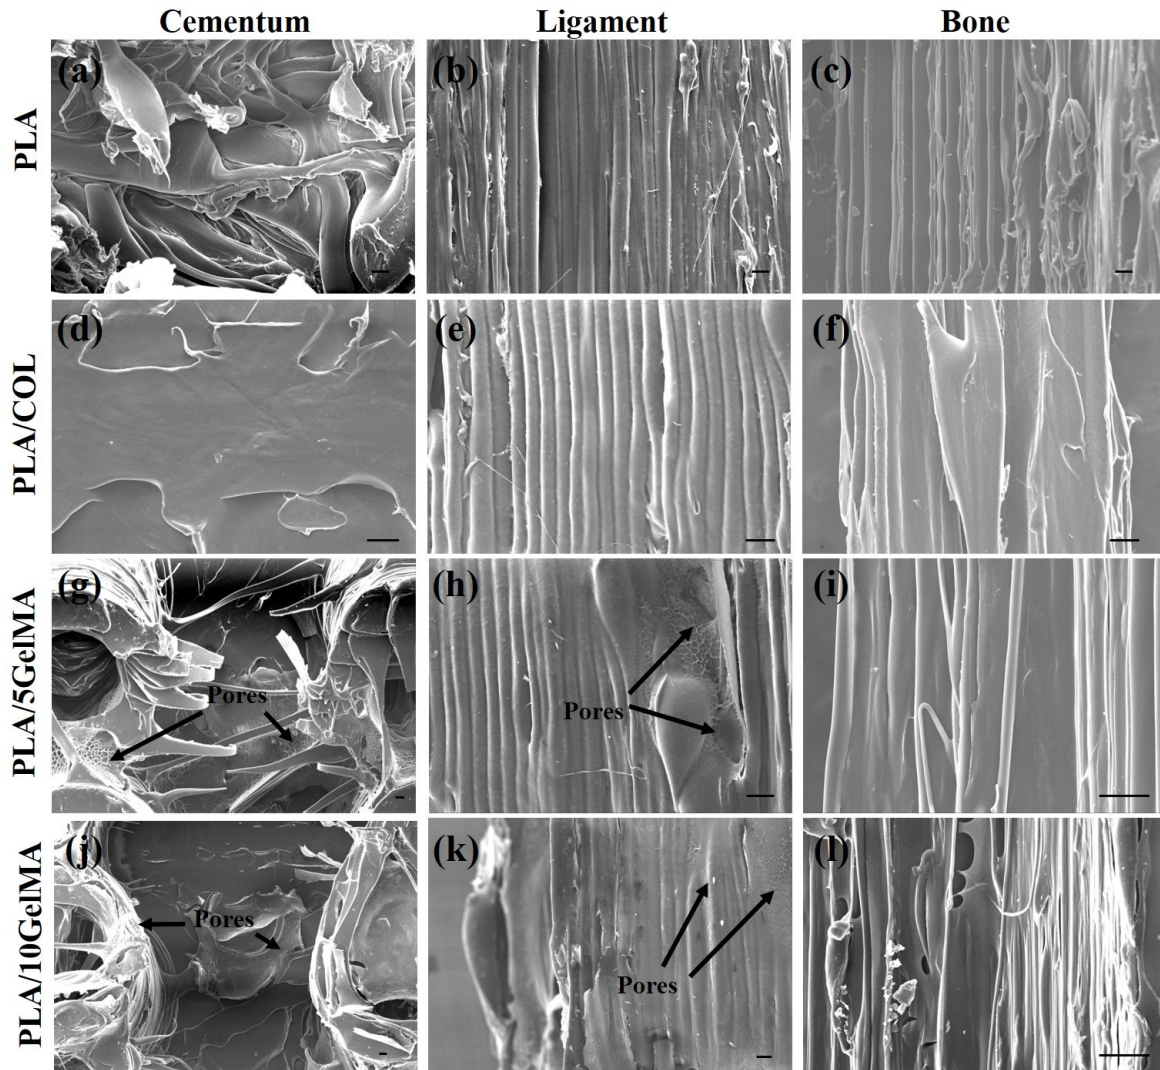

Figure S3: The Scanning Electron Microscopy (SEM) images of cementum, periodontal ligament and bone layer. (a,b,c) shows the intricate micro topology of control PLA scaffold with cementum, ligament and bone layers. (d,e,f) illustrate the relatively smoother topology of PLA/COL scaffolds with cementum, ligament and bone layers. (g,h,i) indicate the surface of PLA/5GelMA surface with cementum, ligament and bone layers. The pores on the scaffold due to GelMA coating are clearly visible in (g) and (h). (j,k,l) shows the surface topography of PLA/10GelMA scaffold with cementum, ligament and bone layers. The decreased pore size is indicated in (j) and (k). Scale for all images is 100 $\mu$ m.

| Group       | Cementum scaffold<br>Root mean square roughness<br>(Rq) (nm) | Bone Scaffold<br>Root mean square roughness<br>(Rq) (nm) |
|-------------|--------------------------------------------------------------|----------------------------------------------------------|
| PLA         | 109.3 $\pm$ 15.8                                             | 77.27 $\pm$ 16.23                                        |
| PLA/COL     | 72.16 $\pm$ 38.39                                            | 36.9 $\pm$ 3.83                                          |
| PLA/5GelMA  | 71.17 $\pm$ 27.63                                            | 48.5 $\pm$ 21.7                                          |
| PLA/10GelMA | 57.33 $\pm$ 13.64                                            | 30.4 $\pm$ 7.07                                          |

Table S1. Comparison root means square roughness of PLA, PLA/COL, PLA/5GelMA, and PLA/10GelMA scaffolds by AFM. All data are reported as mean  $\pm$  standard deviation (n = 3).

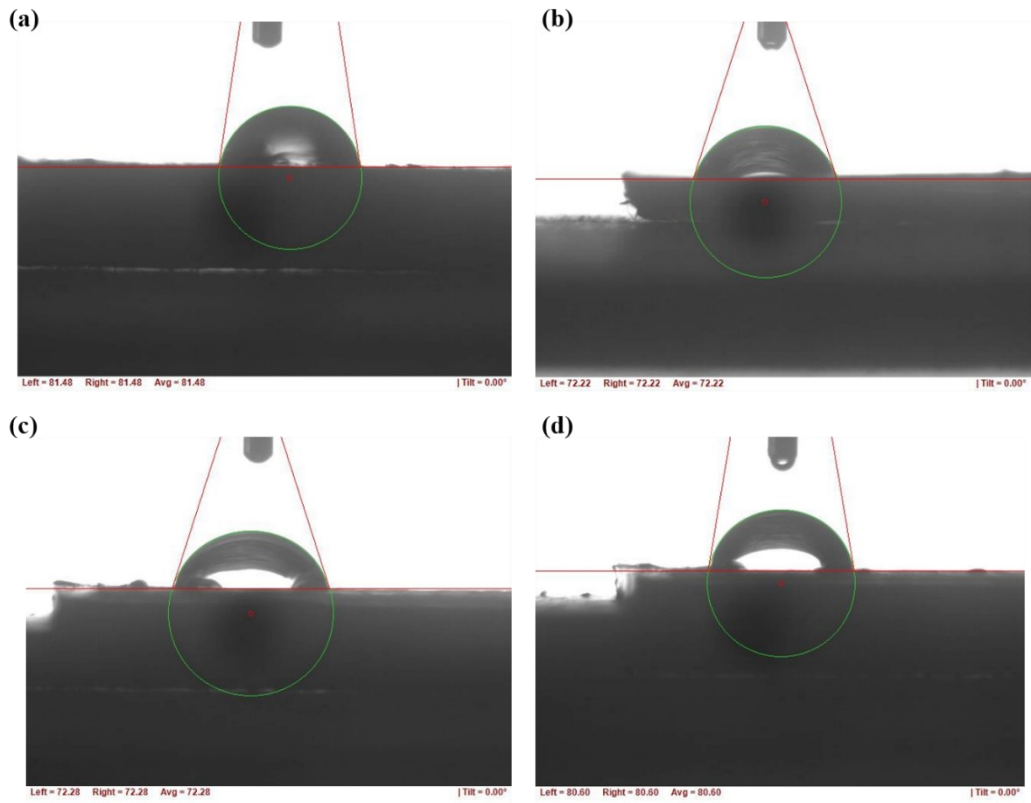

Figure S4. The contact angle of bone layer (a)PLA control scaffold, (b) PLA/COL scaffold, (c) PLA/5GelMA, and (d) PLA/10GelMA

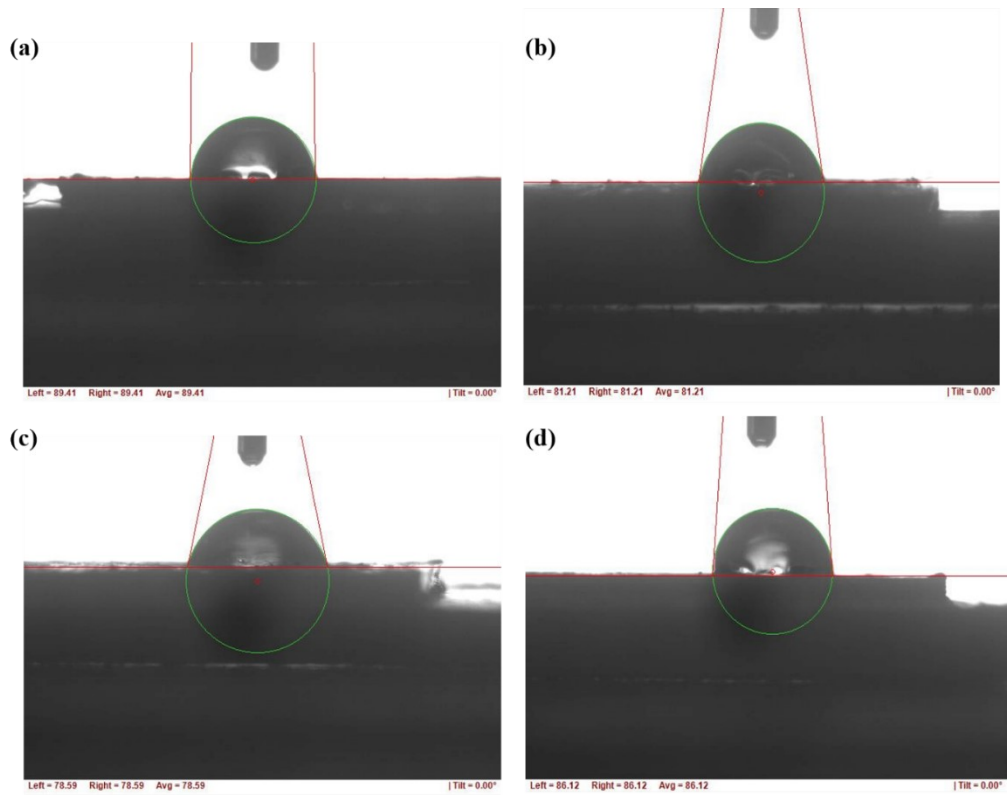

Fig S5: Contact angle of cementum layer (a)PLA scaffold, (b) PLA/COL scaffold, (c) PLA/5GelMA, and (d) PLA/10GelMA

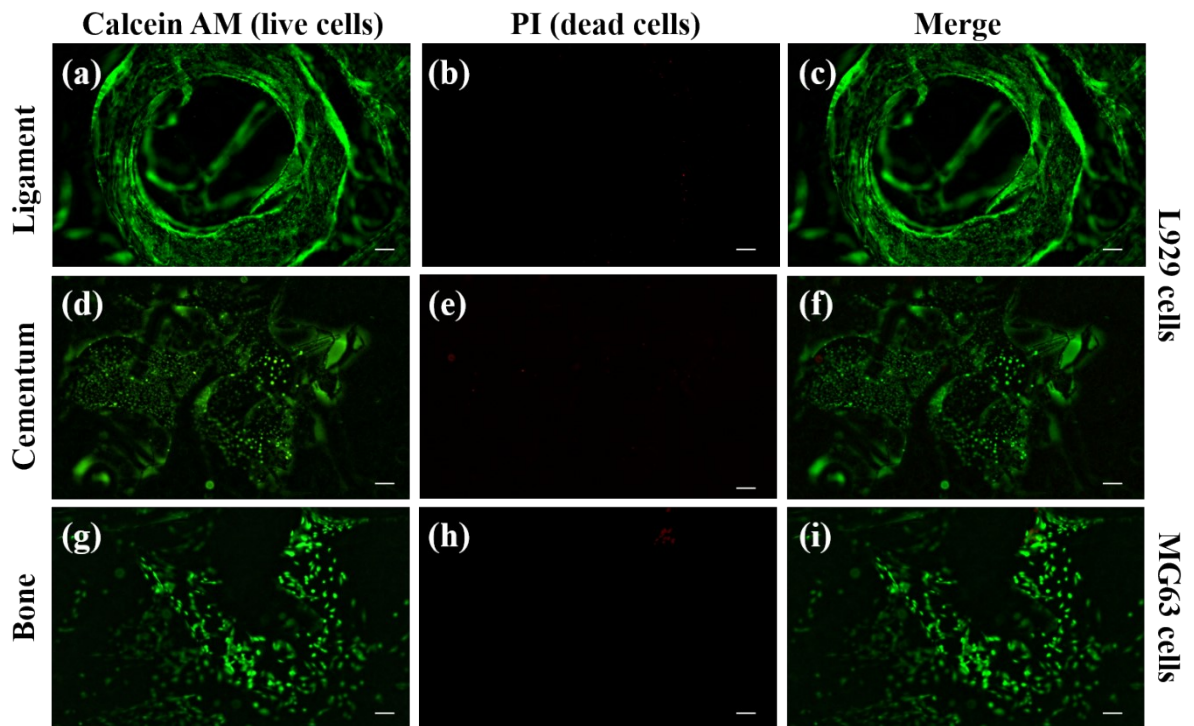

Figure S6. Cell culture on PLA/COL scaffold (a) Live L929 cell staining on ligament (b) dead L929 cells on ligament (c) merged image of (a) and (b), (d) Live L929 cell staining on cementum (b) dead L929 cells on cementum (c) merged image of (d) and (e), (g) Live MG63 cell staining on bone (h) dead MG63 cells on bone (i) merged image of (g) and (h). Calcein AM stain live(green) and PI dyes stain dead cells (red). Scale for all images is 200 $\mu$ m.

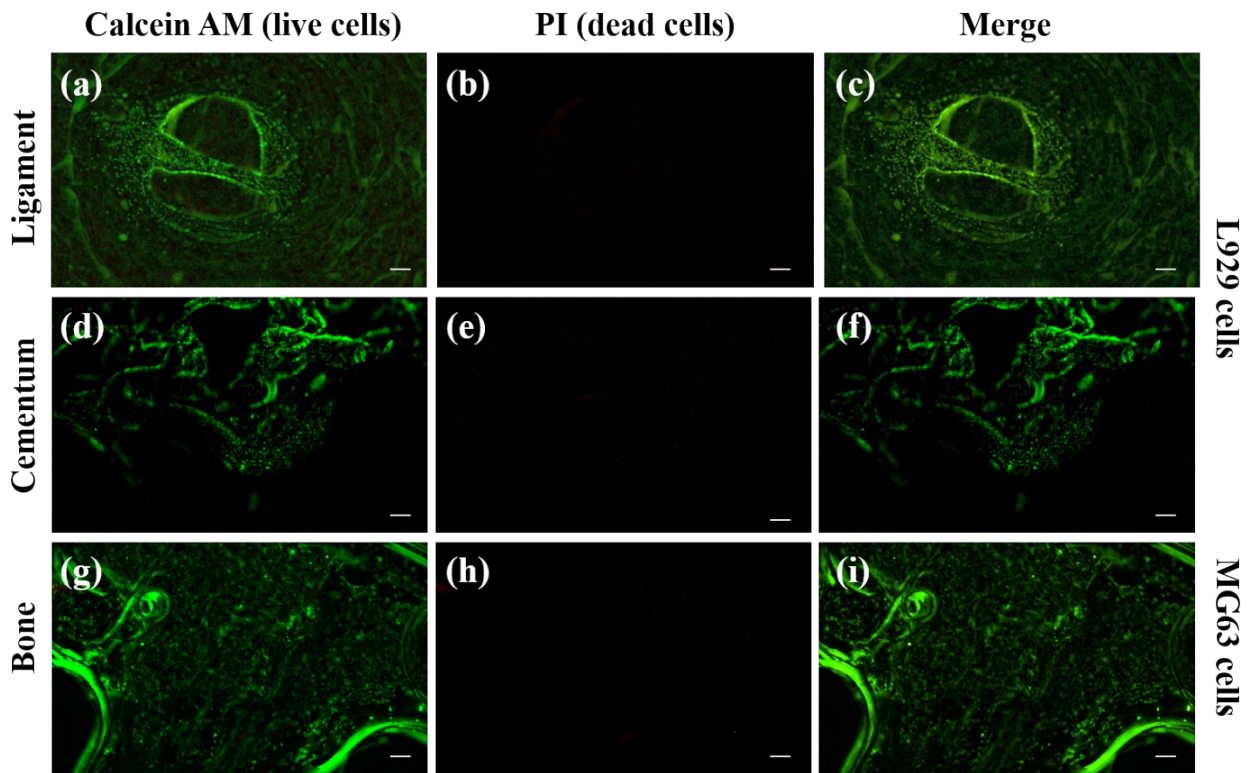

Figure S7. Cell culture on PLA/5GelMA scaffold (a) Live L929 cell staining on ligament (b) dead L929 cells on ligament (c) merged image of (a) and (b), (d) Live L929 cell staining on cementum (e) dead L929 cells on cementum (f) merged image of (d) and (e), (g) Live MG63 cell staining on bone (h) dead MG63 cells on bone (i) merged image of (g) and (h). Calcein AM stain live (green) and PI dyes stain dead cells (red). Scale for all images is 200 $\mu$ m.

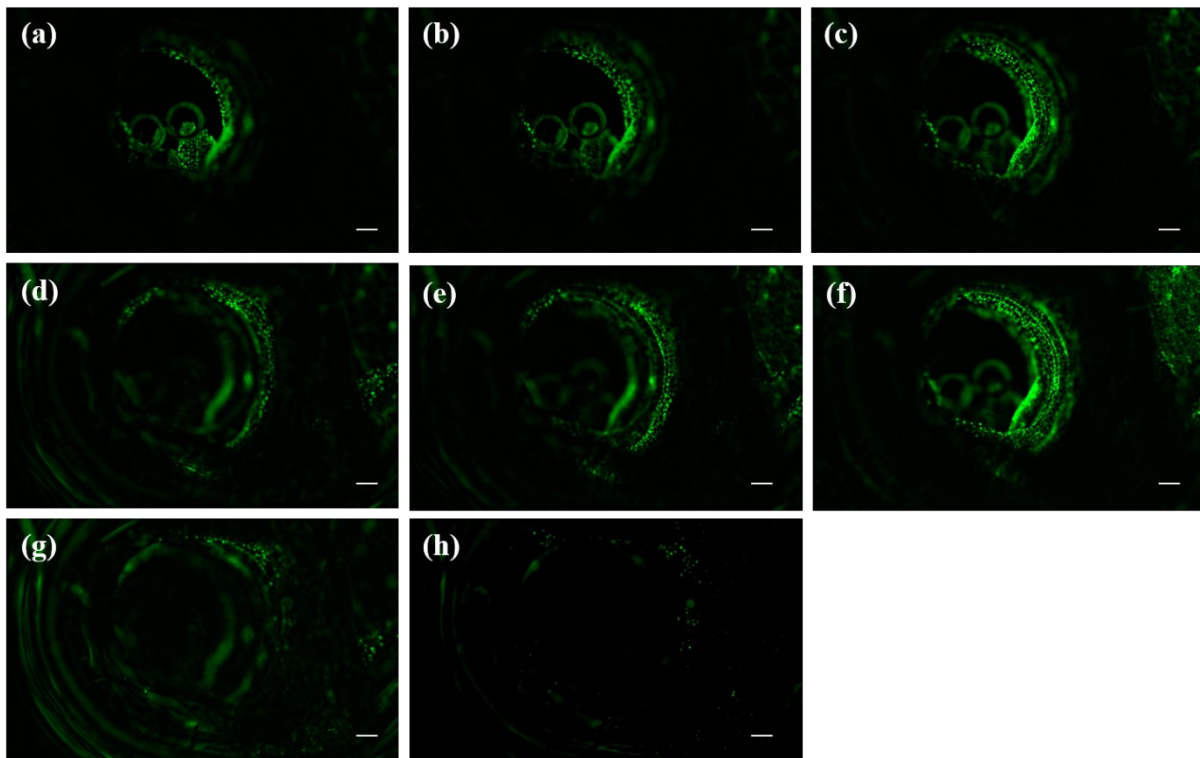

Figure S8. L929 cell inside the periodontal ligament on PLA/5GelMA scaffold. The images are taken at different depth inside the periodontal ligament. Scale for all images is 200 $\mu$ m.

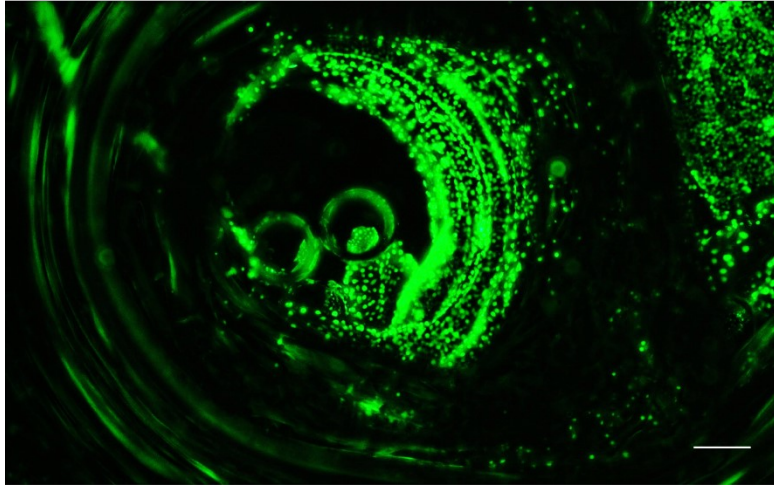

Figure S9. L929 cell inside the periodontal ligament on PLA/5GelMA scaffold. The images are taken at different depth inside the periodontal ligament are stacked to form the image. Scale for the image is 200 $\mu$ m.

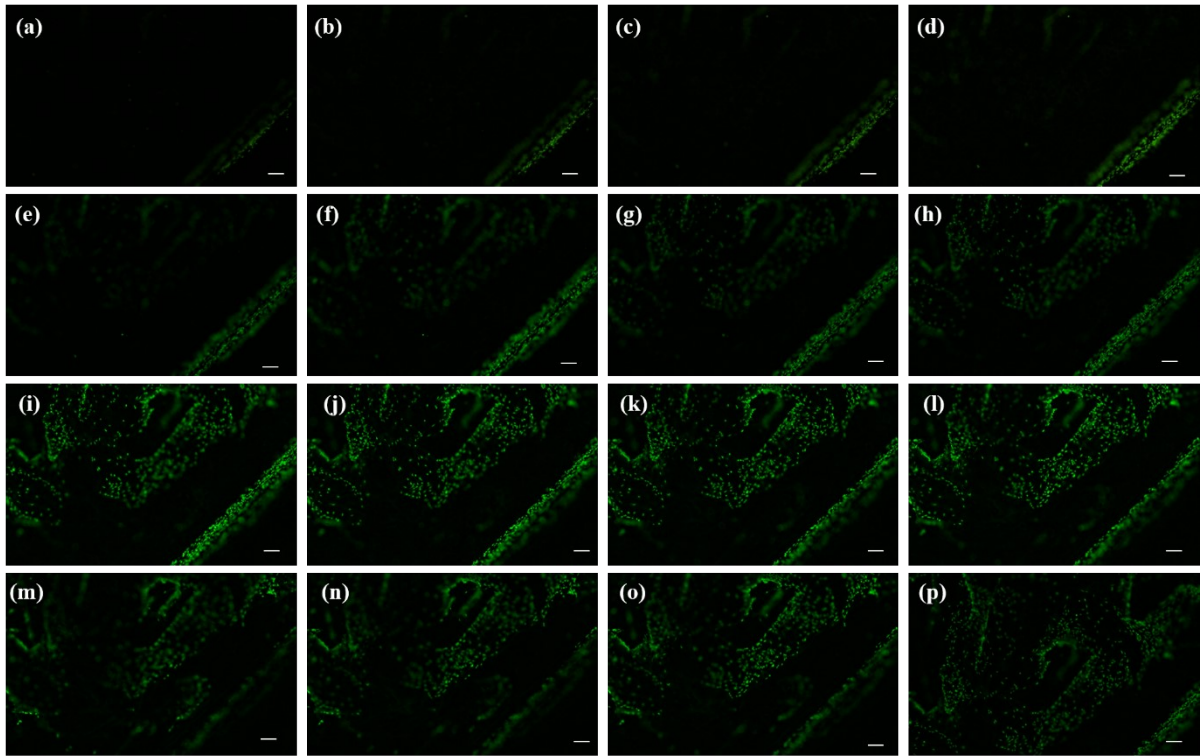

Figure S10. Live L929 cell on top of the cementum shelf on PLA scaffold. The images are taken at different depth on the cementum shelf and on the cementum surface. Scale for the image is 200 $\mu$ m.

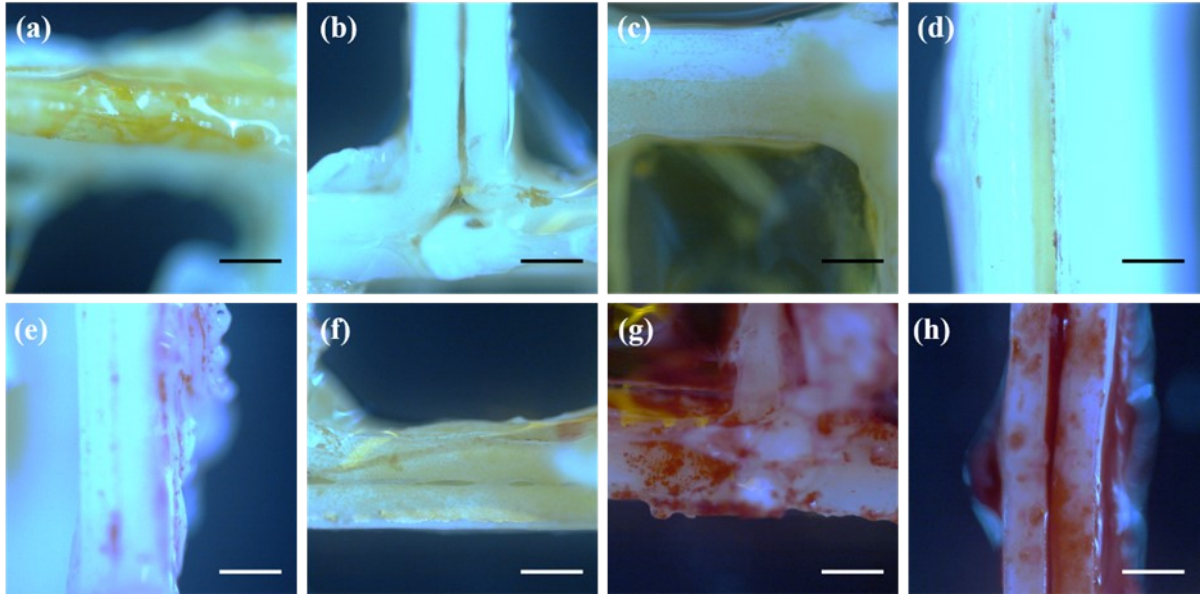

Figure S11: Alizarin red S staining of MG63 cells. Cells cultured in DMEM media on (a) PLA (b) PLA/COL, (c) PLA/5GelMA and (d) PLA/10GelMA bone layers. Cells cultured in osteogenic media on (e) PLA (f) PLA/COL, (g) PLA/5GelMA and (h) PLA/10GelMA bone layers. The MG63 cells were cultured on various specimens for 7 days. Scale for images 500 $\mu$ m.

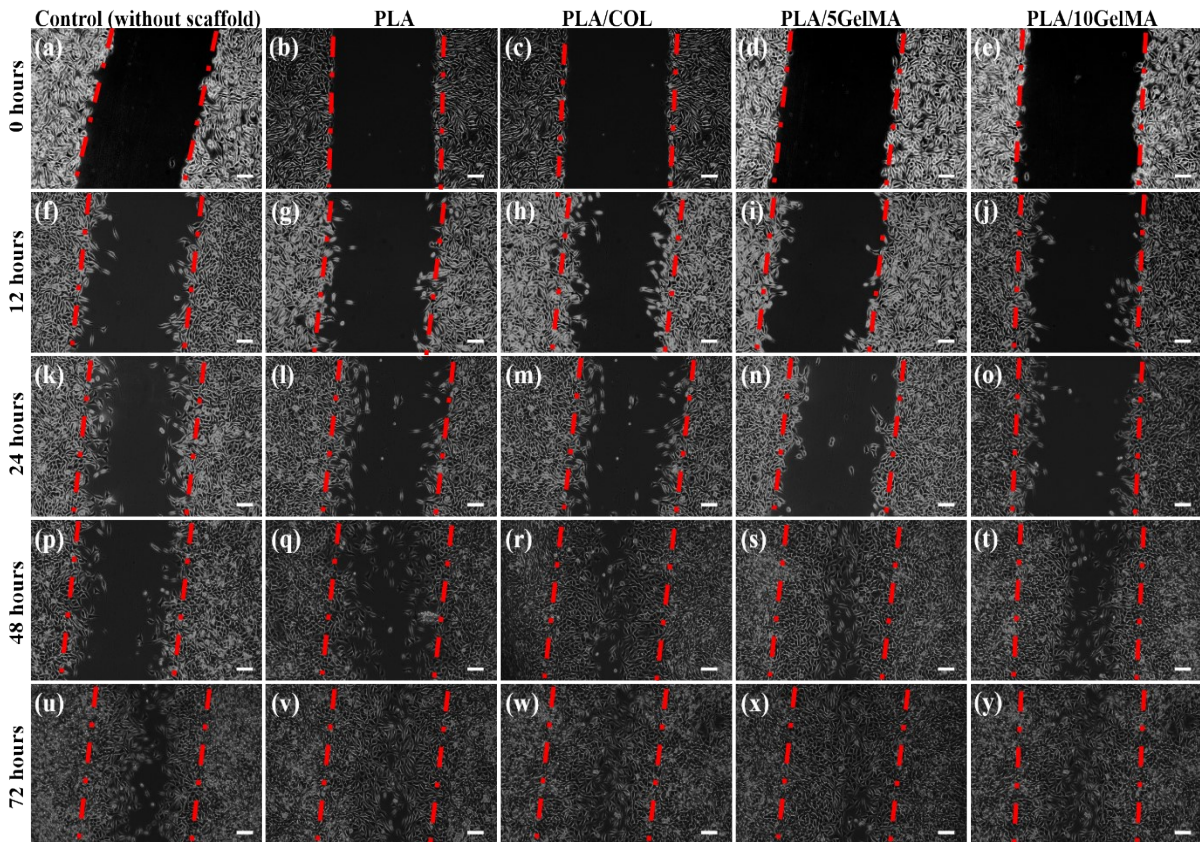

Figure S12: The effectiveness of the different scaffolds was measured by In vitro wound healing assay using L929 cells. Microscopic images showing the scratched area at the beginning of experiment (0 hours), 12 hours, 24 hours, 48 hours, and after 72 hours migration cell (scratch assay) using inverted

microscope (IX73, Olympus, Japan). Red dotted lines indicate initial scratch edges. Scale for the image is 200 $\mu$ m

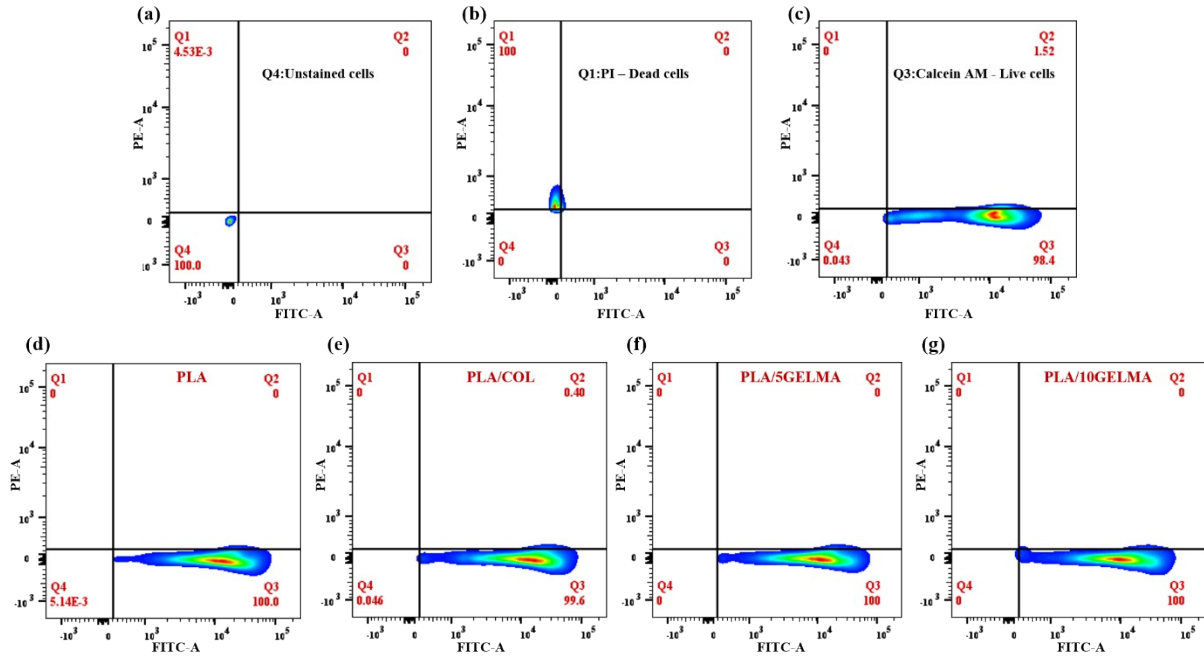

Figure S13. Flow cytometry-based quantification of live and dead MG63 cells on scaffolds. (a) unstained MG63 cell population (b) cell stained with PI dye (dead cells) (c) cells stained with calcein AM (live cells) (d) the percentage of live and dead cells on PLA scaffold (e) the percentage of live and dead cells on PLA/COL scaffold (f) the percentage of live and dead cells on 5GELMA scaffold (g) the percentage of live and dead cells on PLA/10GelMA scaffold after 1 day incubation.



|                                  | Compressive strength | Anchorage of the ligament to bone and cementum layers | Cell viability                                                  | Customizable scaffold | Multiple oriented fibers | Technology used                        | Material used                                                         | Regenerative layers |
|----------------------------------|----------------------|-------------------------------------------------------|-----------------------------------------------------------------|-----------------------|--------------------------|----------------------------------------|-----------------------------------------------------------------------|---------------------|
| <b>Our proposed work</b>         | 13.48MPa to 14.36MPa | Yes                                                   | 100% for L929 and MG63 cell lines (from flow cytometry results) | Yes                   | Yes                      | FDM                                    | PLA with collagen and (GelMA) coating                                 | Yes                 |
| <b>Sowmya et al<sup>1</sup></b>  | Not mentioned        | No                                                    | Good                                                            | No                    | No                       | Solution was frozen, and lyophilized   | Chitin-PLGA                                                           | Yes                 |
| <b>Ding et al<sup>2</sup></b>    | 2.32 MPa to 2.17 MPa | No                                                    | Good                                                            | No                    | No                       | Coaxial spinning                       | Poly(L-lactic acid)/poly(lactide-co-glycolide) (PLLA/PLGA) core/shell | Yes                 |
| <b>Vurat et al<sup>3</sup></b>   | ~20 kPa              | No                                                    | Good                                                            | No                    | No                       | Microfluidic platform and bio printing | GelMA                                                                 | No                  |
| <b>Lee et al<sup>4</sup></b>     | Not mentioned        | Yes                                                   | Good                                                            | No                    | No                       | 3D printing                            | Poly caprolactone /hydroxyapatite                                     | Yes                 |
| <b>Miranda et al<sup>5</sup></b> | Not mentioned        | No                                                    | Good                                                            | No                    | No                       | Solution was frozen, and lyophilized   | Chitosan-hyaluronic acid                                              | No                  |
| <b>Dubey et al<sup>6</sup></b>   | ~ 70kPa              | No                                                    | Good                                                            | No                    | No                       | Melt electrowriting                    | Polycaprolactone                                                      | No                  |
| <b>Staples et al<sup>7</sup></b> | Not mentioned        | No                                                    | Good                                                            | No                    | yes                      | Melt electrowriting                    | Polycaprolactone                                                      | No                  |

Table S2: Comparison table representing our proposed work and the other similar works

#### References:

- 1 S. Sowmya, U. Mony, P. Jayachandran, S. Reshma, R. A. Kumar, H. Arzate, S. V. Nair and R. Jayakumar, *Adv Healthc Mater*, 2017, **6**, 1–13.
- 2 T. Ding, J. Li, X. Zhang, L. Du, Y. Li, D. Li, B. Kong and S. Ge, *Biomater Sci*, 2020, **8**, 2459–2471.
- 3 M. T. Vurat, Ş. Şeker, Ö. Lalegül-Ülker, M. Parmaksiz, A. E. Elçin and Y. M. Elçin, *Genes Dis*, 2022, **9**, 1008–1023.
- 4 C. H. Lee, J. Hajibandeh, T. Suzuki, A. Fan, P. Shang and J. J. Mao, *Tissue Eng Part A*, 2014, **20**, 1342–1351.

- 5 D. G. Miranda, S. M. Malmonge, D. M. Campos, N. G. Attik, B. Grosgeat and K. Gritsch, *J Biomed Mater Res B Appl Biomater*, 2016, **104**, 1691–1702.
- 6 N. Dubey, J. A. Ferreira, A. Dagherery, Z. Aytac, J. Malda, S. B. Bhaduri and M. C. Bottino, *Acta Biomater*, 2020, **113**, 164–176.
- 7 R. J. Staples, S. Ivanovski and C. Vaquette, *J Periodontal Res*, 2020, **55**, 331–341.
